# Supplementary material
Source: publisher figshare collection journal article supplement (https://frontiersin.figshare.com/ndownloader/files/24606146)
Supplement: Supplementary file 1 [file 24606146]

## *Supplementary Material*

### **1**    **Supplementary Figures**

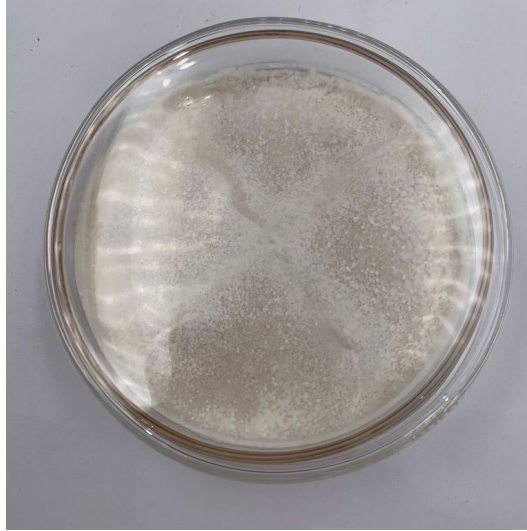

**Supplementary Figure 1.** Antagonistic tests between *P. chrysosporium* and *I. lacteus*
